# Supplementary material for: Stable P3HT-PC61BM inverted organic solar cells based on cerium oxide as an electron transport layer
Source: Royal Society of Chemistry journal article supplement (doi:10.1039/d4nj04579c), 2024-01-01
Supplement: d4nj04579c1.pdf [file d4nj04579c1.pdf]

## Supporting Information

### Stable P3HT-PC<sub>61</sub>BM inverted organic solar cells based on cerium oxide as electron transport layer

Sana Abidi,<sup>a,b</sup> Amir Hossein Habibi,<sup>a</sup> Hayley Melville,<sup>a</sup> Sylvie Dabos-Seignon,<sup>a</sup> Olivier Segut,<sup>a</sup> Tony Breton,<sup>a</sup> Eric Levillain,<sup>a</sup> Clément Cabanetos,<sup>a</sup> Saad Touihri,<sup>b\*</sup> and Philippe Blanchard<sup>a\*</sup>

<sup>a</sup> Univ Angers, CNRS, MOLTECH-ANJOU, SFR MATRIX, F-49000 Angers, France.

<sup>b</sup> Laboratoire Nanomatériaux, Nanotechnologie et Energie (L2NE), University of Tunis el Manar, Tunisia.

Corresponding authors: [philippe.blanchard@univ-angers.fr](mailto:philippe.blanchard@univ-angers.fr); [saad.touihri@ensit.rnu.tn](mailto:saad.touihri@ensit.rnu.tn)

#### Table of contents:

1. General methods
2. X-ray photoelectron spectroscopy (XPS)
3. Transmittance measurements and determination of optical bandgaps  $E_g$
4. Contact angle measurements
5. Absorption spectra of the P3HT:PC<sub>61</sub>BM photoactive layer
6. AFM analysis of the P3HT:PC<sub>61</sub>BM photoactive layer
7. PESA measurements and determination of ionization energies
8. AFM analysis of CeO<sub>x</sub> layers
9. Evaluation of device stability
10. References

## 1. General methods

UV-vis spectra were recorded on a Shimadzu UV-1800 spectrometer (Shimadzu, Kyoto, Japan). Infrared spectra were recorded on a Bruker spectrometer Vertex 70. Thermogravimetric analysis (TGA) measurements were performed with a TA Instruments Q500 with a ramp of 10 °C/min under a nitrogen flow. Photoelectron spectroscopy in air (PESA) was carried out on a Riken AC-2 photoelectron spectrometer (Riken Keiki, Tokyo, Japan). Thin-film X-ray diffraction (XRD) analysis which was measured on a D8 Bruker diffractometer (Cu K $\alpha$ ,  $\lambda = 1.5418 \text{ \AA}$ ) equipped with a linear Vantec super speed detector. X-ray photoelectron spectroscopy (XPS) analyses were recorded on a Kratos Axis Ultra spectrometer and the X-ray source employed was monochromated Al K $\alpha$  source operating at 1486.6 eV. Atomic force microscopy (AFM) experiments were performed using the Nano-Observer device from CS Instrument. Images were processed with the Gwyddion free SPM data analysis software. The thickness of layer was measured using a KLA Tencor-D500 optical profilometer. Measurements of contact angles of liquid droplets were carried out with a contact angle goniometer from Ossila.

## 2. X-ray photoelectron spectroscopy (XPS)

XPS data were acquired using a Kratos Axis Ultra spectrometer. The X-ray source employed was monochromated Al K $\alpha$  source operating at 1486.6 eV. Spectra were collected at a take-off angle of 90°, using a spot size of 0.7  $\times$  0.3 mm<sup>2</sup> at a pressure below 10<sup>-8</sup> mbar. High-resolution scans were performed with a step size of 0.1 eV and a pass energy of 40 eV. Calibration was done using C1s as a reference, with a binding energy of 284.5 eV, without the need for an internal standard. XPS spectra were analyzed using the curve-fitting software CASA XPS. The background subtraction was performed using the U2 Tougaard method, followed by fitting the peaks using a pseudo-Voigt function that combined Gaussian and Lorentzian functions.

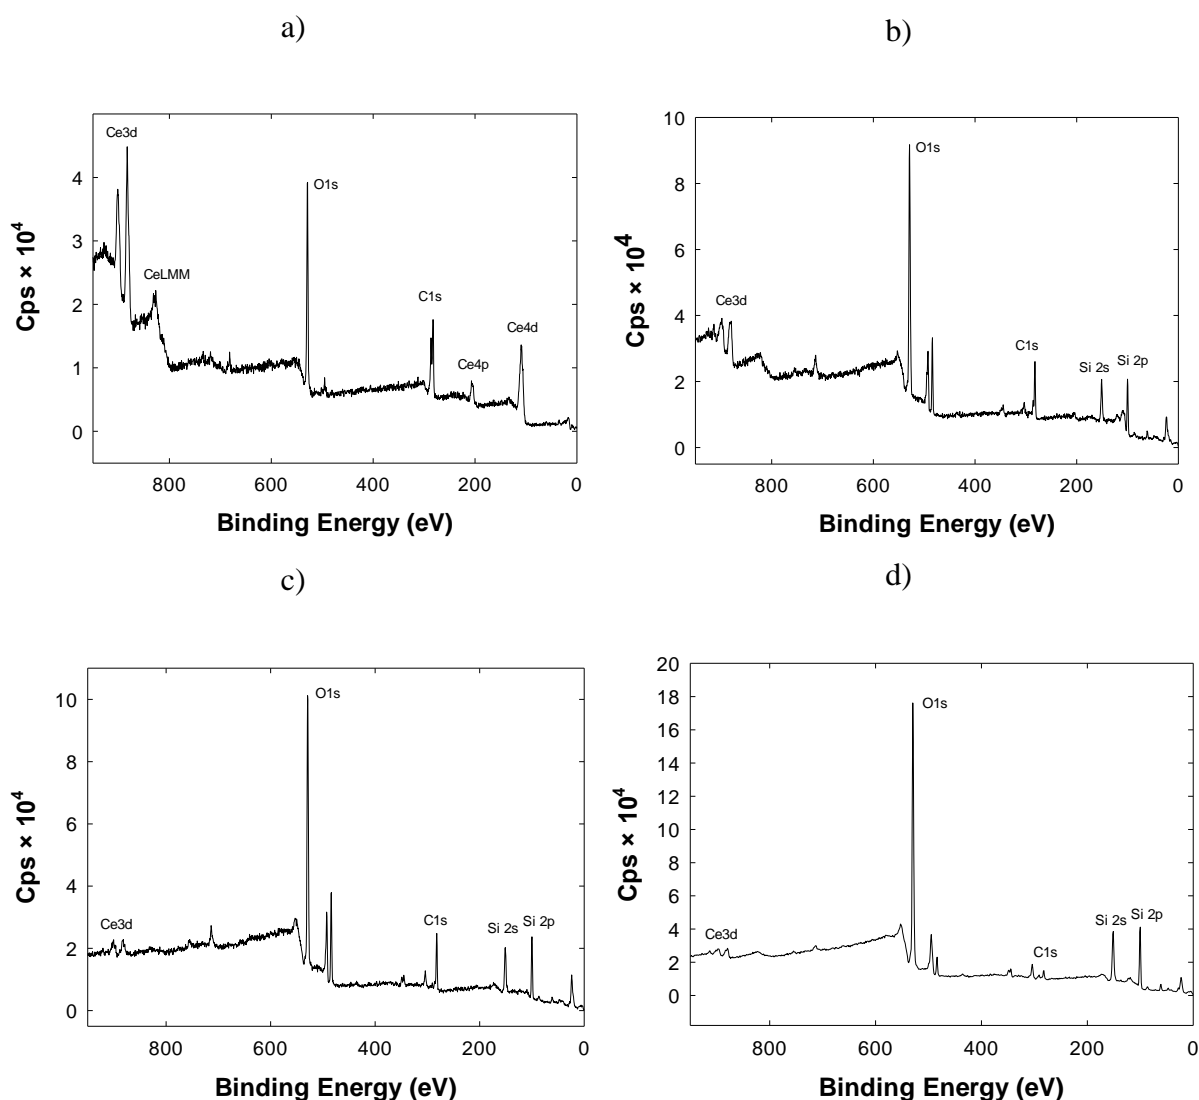

**Figure S1.** Full XPS spectra of cerium(III) acetate (a), thin films of the CeO<sub>x</sub> precursor without TA (b), and after treatment at 200°C (c) or 450°C (d) for 15 min.

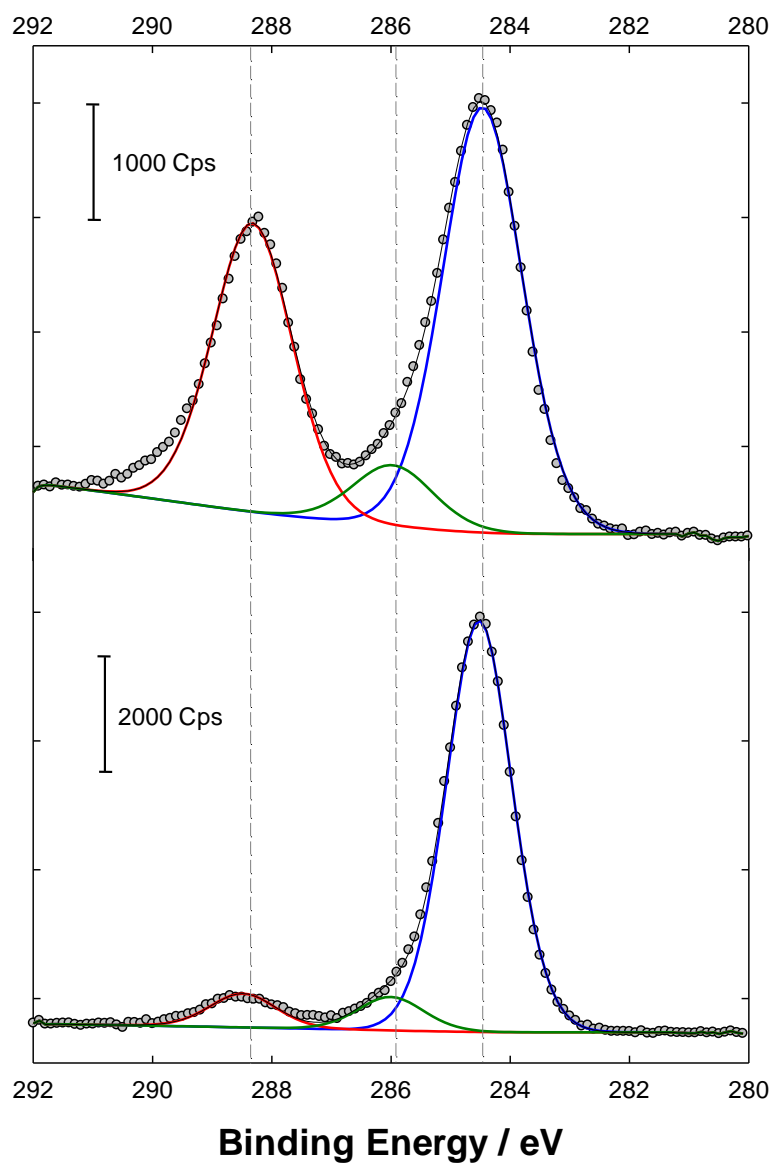

**Figure S2.** Carbon 1s XPS core-level spectra of cerium(III) acetate as powder (top) and a thin film of the CeO<sub>x</sub> precursor without TA (bottom).

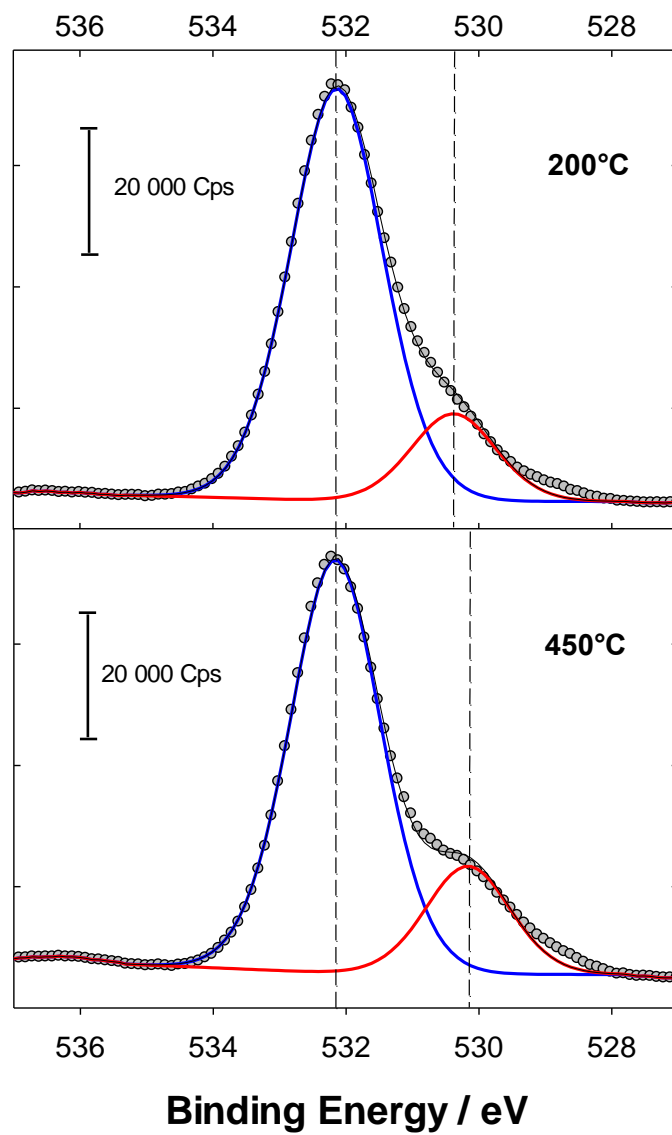

**Figure S3.** Oxygen 1s XPS core-level spectra of thin films of the  $\text{CeO}_x$  precursor after treatment at 200°C (top) or 450°C (bottom) for 15 min.

### 3. Transmittance measurements and determination of optical bandgaps $E_g$

The transmission spectra of ZnO and CeO<sub>x</sub> thin films are shown in Figure X. The band energies of ZnO and CeO<sub>x</sub> were measured using the Tauc method according to the following equation:<sup>1</sup>

$$\alpha h\nu = B(h\nu - E_g)^{\frac{1}{2}},$$

where  $h$  is Planck's constant,  $\nu$  is the photon frequency,  $E_g$  is the bandgap and  $\alpha$  is the absorption coefficient obtained from the experimental transmission values (T) according to the expression below:<sup>1</sup>

$$\alpha = \frac{1}{d} \ln\left(\frac{1}{T}\right),$$

where  $d$  is the film thickness. The thicknesses of the ZnO and CeO<sub>x</sub> layers, measured by profilometry, are around 25 and 20 nm, respectively.

By plotting the curve  $(\alpha h\nu)^2$  as a function of incident photon energy ( $h\nu$ ), the bandgap energy values  $E_g$  for ZnO and CeO<sub>x</sub> were determined by linear extrapolation of the curve to the energy axis and found to be 3.5 eV and 3.55 eV, respectively.

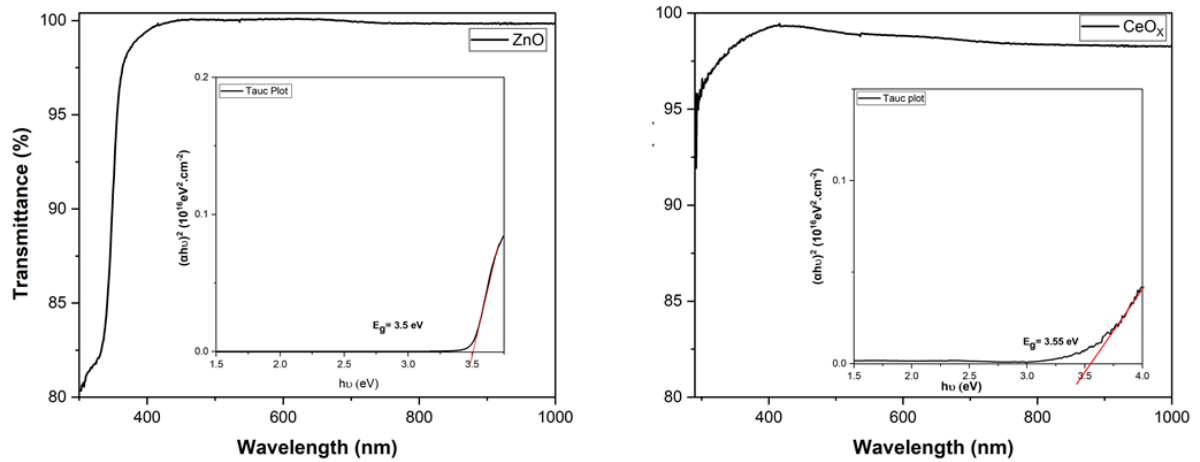

**Figure S4.** Transmission spectra of ZnO and CeO<sub>x</sub> thin films on glass and determination of  $E_g$ .

#### 4. Contact angle measurements

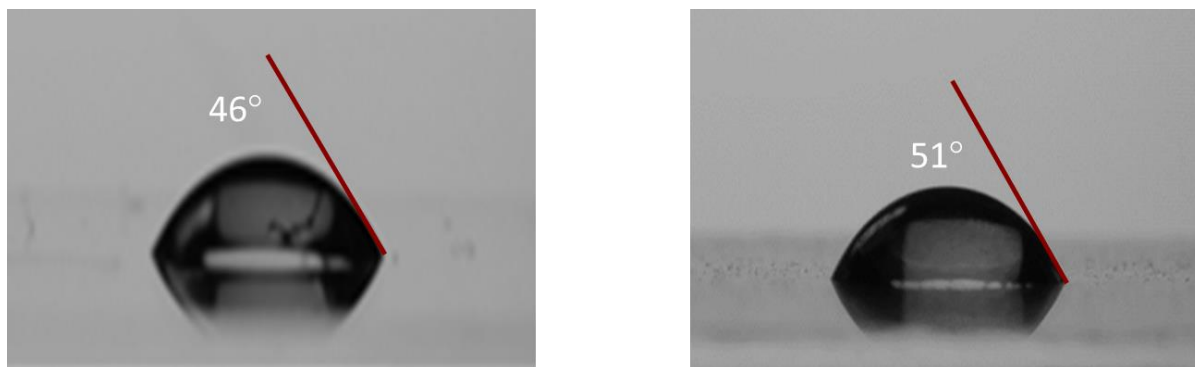

**Figure S5.** Contact angle measurements of a drop of water on a film of ZnO (left) and CeO<sub>x</sub> (right).

#### 5. Absorption spectra of the P3HT:PC<sub>61</sub>BM photoactive layer

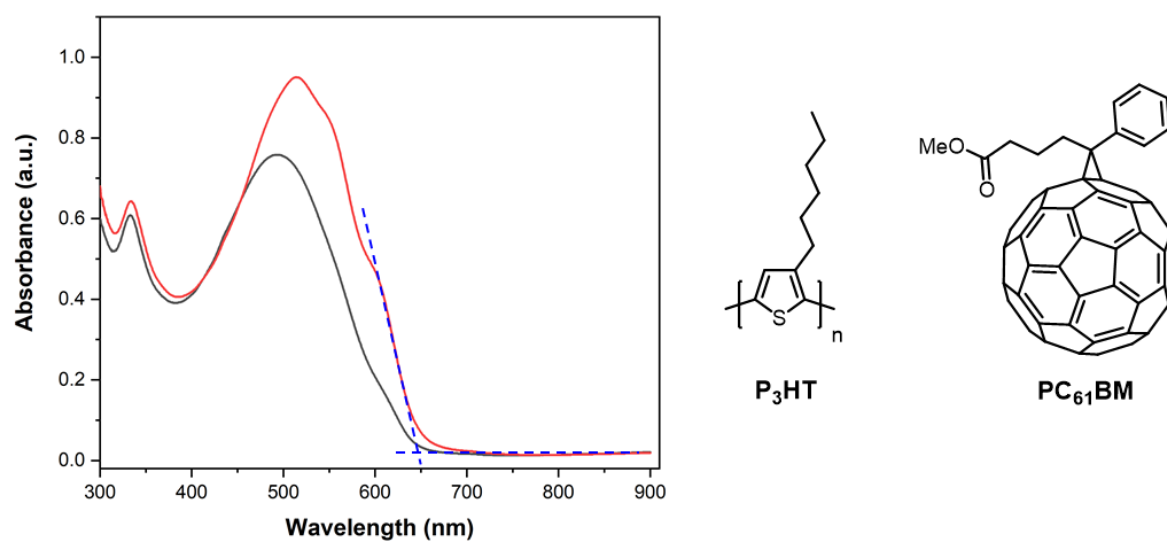

**Figure S6.** Absorption spectra of the P<sub>3</sub>HT:PC<sub>61</sub>BM active layer on glass as spin-cast (black) and after annealing at 110°C for 3 minutes. Determination of the optical bandgap:

$$\lambda = 651 \text{ nm}, E_g \text{ (eV)} = (hc)/(e\lambda) = 1240/651 = 1.90 \text{ eV}.$$

## 6. AFM analysis of the P3HT:PC<sub>61</sub>BM photoactive layer

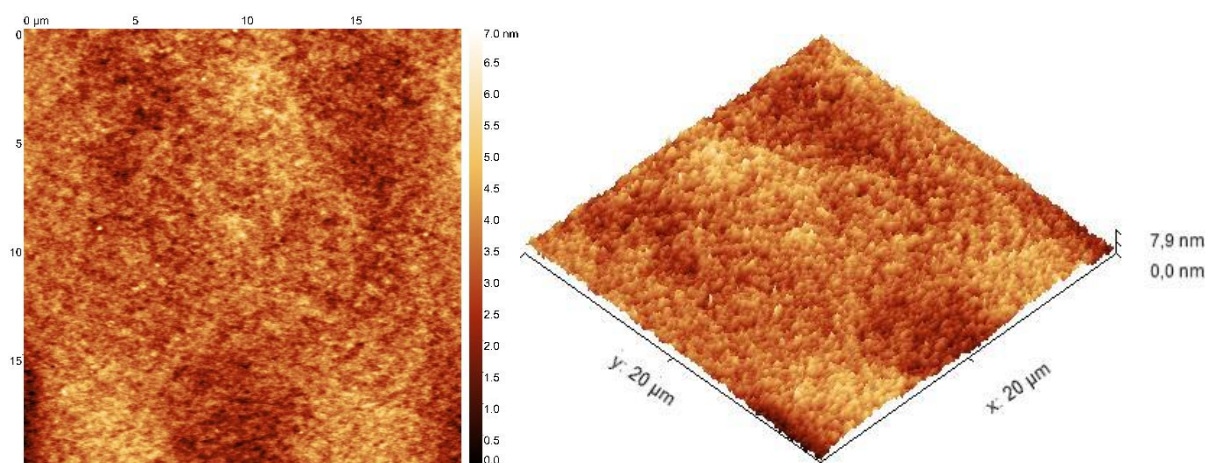

**RMS = 0.76 nm**

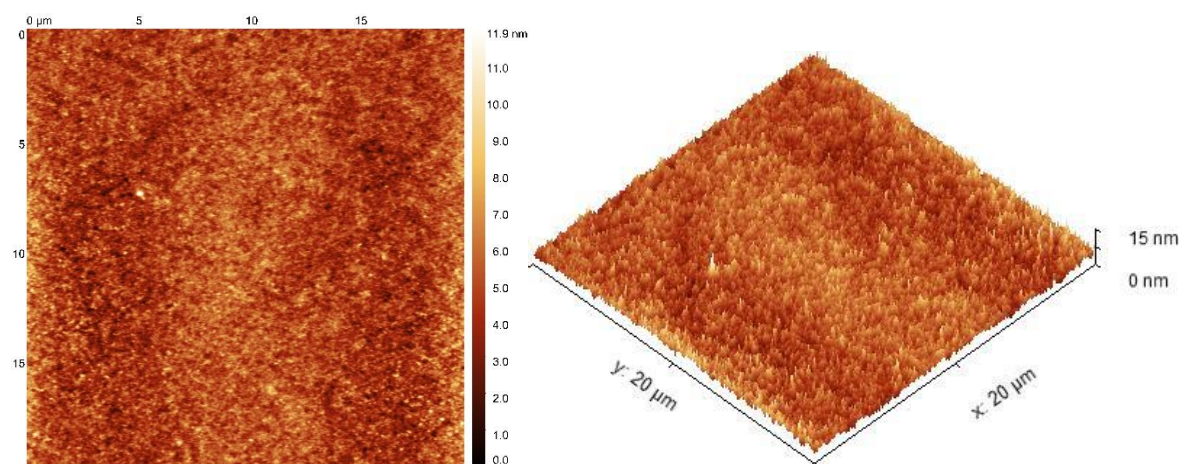

**RMS = 2.86 nm**

**Figure S7.** Contact mode AFM images of a P3HT:PC<sub>61</sub>BM layer before (Top) and after (Bottom) thermal annealing at 110°C for 3 minutes.



## 7. PESA measurements and determination of ionization energies

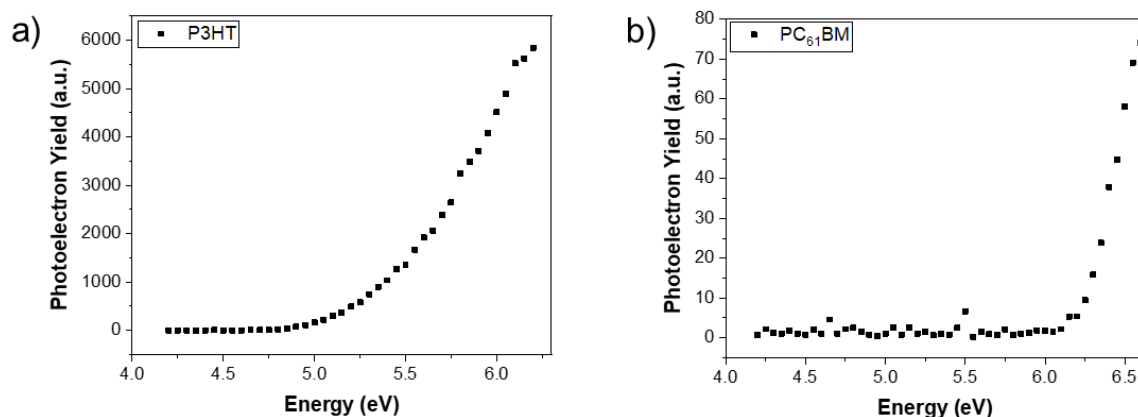

**Figure S8.** PESA spectra of thin films of P3HT (a) and PC<sub>61</sub>BM (b).

The ionization energy IE (HOMO energy) was determined through a fitting procedure based on data obtained from Photoelectron Spectroscopy in Air (PESA) measurements. This technique allowed for the precise estimation of IE by utilizing the following empirical model:

- For  $V < IE$ , the response function is constant,  $Y = Y_0$ .
- For  $V \geq IE$ , the response function is described by the equation  $Y = Y_0 + a * (V - IE)^{1/n}$ , where  $a$  is a scaling factor and  $n$  is an exponent characterizing the response curve, close to 0.5.

To validate the accuracy and robustness of the model, the data were plotted on a logarithmic scale on the Y-axis. This approach effectively highlights the consistency of the empirical model across different voltage ranges, confirming its reliability in estimating the ionization energy.

## 8. AFM analysis of CeO<sub>x</sub> layers

CeO<sub>x</sub> layers obtained after TA at 200°C for 15 min

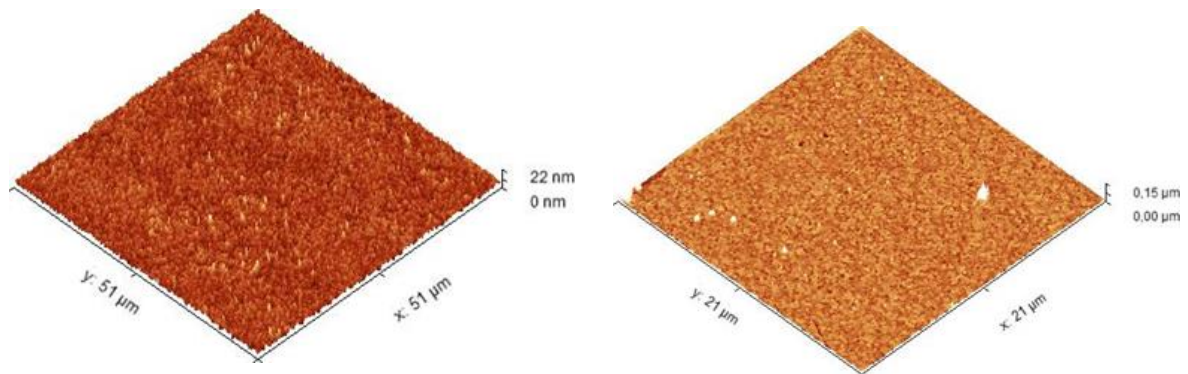

CeO<sub>x</sub> layers obtained after TA at 450°C for 15 min

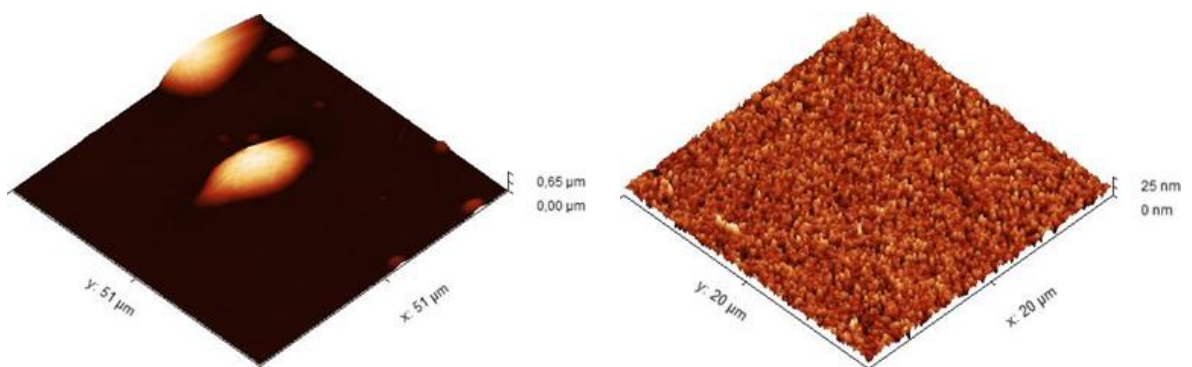

**Figure S9.** Contact mode AFM images (50 μm × 50 μm and 20 μm × 20 μm) of CeO<sub>x</sub> films annealed for 15 min at 200°C (top) or 450°C (bottom).

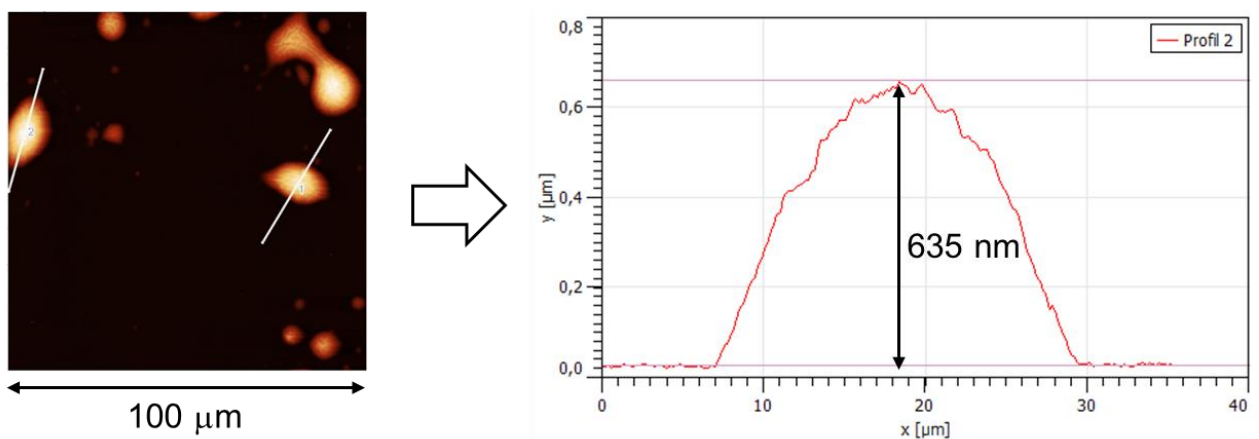

**Figure S10.** AFM images (100 μm × 100 μm) in contact mode of a CeO<sub>x</sub> film annealed for 15 min at 450°C and profile of one crystalline cluster showing a height of 635 nm.

## 9. Evaluation of device stability

Conditions: The OPV devices were stored in a glove box under 2.5 mbar of argon in ambient light at 20°C, in the absence of organic solvents, with the amount of water and oxygen being less than 0.1 ppm for both.

**Table S1.** Photovoltaic efficiency of a ZnO-based device in a controlled atmosphere (Ar) as a function of time

| Time (h)       | $J_{sc}$ (mA cm <sup>-2</sup> ) | $V_{oc}$ (V) | FF (%) | PCE (%) |
|----------------|---------------------------------|--------------|--------|---------|
| T <sub>0</sub> | 9.48                            | 0.56         | 56     | 3.00    |
| 48 h           | 9.42                            | 0.56         | 57     | 3.05    |
| 168 h          | 9.54                            | 0.57         | 58     | 3.16    |
| 384 h          | 9.22                            | 0.57         | 58     | 3.07    |
| 720 h          | 9.04                            | 0.57         | 59     | 3.05    |

**Table S2.** Photovoltaic efficiency of a CeO<sub>x</sub>-based device in a controlled atmosphere (Ar) as a function of time

| Time (h)       | $J_{sc}$ (mA cm <sup>-2</sup> ) | $V_{oc}$ (V) | FF (%) | PCE (%) |
|----------------|---------------------------------|--------------|--------|---------|
| T <sub>0</sub> | 8.60                            | 0.45         | 44     | 1.71    |
| 120 h          | 9.15                            | 0.46         | 43     | 1.81    |
| 168 h          | 9.71                            | 0.46         | 43     | 1.92    |
| 384 h          | 9.80                            | 0.47         | 46     | 2.12    |
| 720 h          | 9.30                            | 0.45         | 43     | 1.80    |

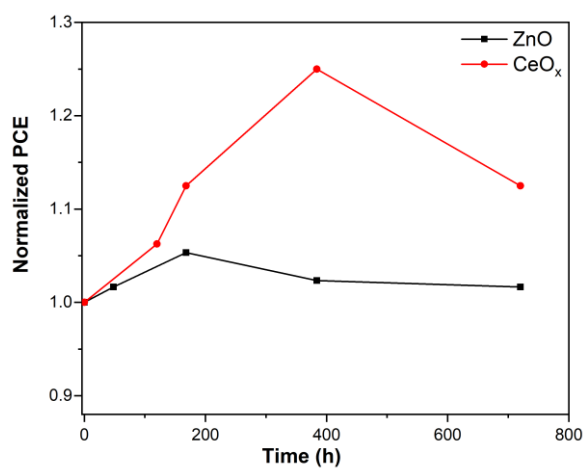

**Figure S11.** Photovoltaic efficiency of devices in a controlled atmosphere (Ar) as a function of time.

**Table S3.** Photovoltaic efficiency of a ZnO-based device in a controlled atmosphere (Ar) as a function of time (Note that ZnO was prepared from a different procedure than the previous one in Table S1)

| <b>Time (month)</b>  | <b>J<sub>sc</sub> (mA cm<sup>-2</sup>)</b> | <b>V<sub>oc</sub> (V)</b> | <b>FF (%)</b> | <b>PCE (%)</b> |
|----------------------|--------------------------------------------|---------------------------|---------------|----------------|
| <b>T<sub>0</sub></b> | 9.03                                       | 0.56                      | 53            | 2.65           |
| <b>1</b>             | 8.21                                       | 0.55                      | 55            | 2.49           |
| <b>5</b>             | 7.23                                       | 0.53                      | 53            | 2.01           |

**Table S4.** Photovoltaic efficiency of a device using the mixed ZnO/CeO<sub>x</sub> layer in a controlled atmosphere as a function of time.

| <b>Time (month)</b>  | <b>J<sub>sc</sub> (mA cm<sup>-2</sup>)</b> | <b>V<sub>oc</sub> (V)</b> | <b>FF (%)</b> | <b>PCE (%)</b> |
|----------------------|--------------------------------------------|---------------------------|---------------|----------------|
| <b>T<sub>0</sub></b> | 8.25                                       | 0.50                      | 50            | 2.08           |
| <b>1</b>             | 7.79                                       | 0.51                      | 51            | 2.03           |
| <b>5</b>             | 7.87                                       | 0.52                      | 43            | 1.77           |

## 10. References

1. P. Nagaraju, Y. VijayaKumar, P. Radhika, R. J. Choudhary and M. V. RamanaReddy, *Materials Today: Proceedings*, 2016, **3**, 4009.
